# Supplementary material
Source: Royal Society of Chemistry journal article supplement (doi:10.1039/d6tc01065b)
Supplement: d6tc01065b1.pdf [file d6tc01065b1.pdf]

## Supplementary materials for "Prediction of high-temperature superconductivity in lithium-doped thorium superhydrides under high pressures"

Zengguang Zhou,<sup>1</sup> Wenwen Cui,<sup>1,\*</sup> Xiuxian Yang,<sup>1,†</sup> Shicong Ding,<sup>1</sup> Weishuo Xu,<sup>1</sup>  
Jingming Shi,<sup>1</sup> Artur P. Durajski,<sup>2</sup> Ying Sun,<sup>3</sup> Hanyu Liu,<sup>3</sup> and Yinwei Li<sup>1,‡</sup>

<sup>1</sup>*Jiangsu Key Laboratory of Extreme Multi-Field Material Physics, School of Physics  
and Electronic Engineering, Jiangsu Normal University, Xuzhou 221116, China*

<sup>2</sup>*Faculty of Electrical Engineering, Czestochowa University of  
Technology, Armii Krajowej 17, 42-200 Czestochowa, Poland*

<sup>3</sup>*Key Laboratory of Material Simulation Methods and Software of  
Ministry of Education and State Key Laboratory of Superhard Materials,  
College of Physics, Jilin University, Changchun 130012, China*

---

\* wenwencui@jsnu.edu.cn

† xiuxian\_yang@outlook.com

‡ yinwei\_li@jsnu.edu.cn

SUPPLEMENTARY TABLE AND FIGURES

TABLE S1. Structural parameters of various structures studied in this work.

| Pressure<br>(GPa) | System                            | Space<br>group | Lattice Parameters<br>(Å)                       | Atomic coordinates (fractional) |         |         |         |
|-------------------|-----------------------------------|----------------|-------------------------------------------------|---------------------------------|---------|---------|---------|
|                   |                                   |                |                                                 | Atom                            | $x$     | $y$     | $z$     |
| 300               | Li <sub>2</sub> ThH <sub>17</sub> | $Fd\bar{3}m$   | $a = 7.07440$<br>$b = 7.07440$<br>$c = 7.07440$ | Li (16c)                        | 0.12500 | 0.12500 | 0.12500 |
|                   |                                   |                |                                                 | Th (8b)                         | 0.00000 | 0.00000 | 0.50000 |
|                   |                                   |                |                                                 | H (96g)                         | 0.19988 | 0.19988 | 0.48550 |
|                   |                                   |                |                                                 | H (32e)                         | 0.33938 | 0.33938 | 0.33938 |
|                   |                                   |                |                                                 | H (8a)                          | 0.25000 | 0.25000 | 0.25000 |
| 300               | Li <sub>2</sub> ThH <sub>16</sub> | $Fd\bar{3}m$   | $a = 7.00640$<br>$b = 7.00640$<br>$c = 7.00640$ | Li (16c)                        | 0.12500 | 0.12500 | 0.12500 |
|                   |                                   |                |                                                 | Th (8b)                         | 0.00000 | 0.00000 | 0.50000 |
|                   |                                   |                |                                                 | H (32e)                         | 0.42197 | 0.92197 | 0.42197 |
|                   |                                   |                |                                                 | H (96g)                         | 0.19883 | 0.19883 | 0.48228 |
| 300               | LiTh <sub>2</sub> H <sub>12</sub> | $C2/m$         | $a = 6.00390$<br>$b = 3.48620$<br>$c = 4.68090$ | Li (2d)                         | 0.50000 | 0.00000 | 0.50000 |
|                   |                                   |                |                                                 | Th (4i)                         | 0.78406 | 0.00000 | 0.21705 |
|                   |                                   |                |                                                 | H (8j)                          | 0.58284 | 0.30530 | 0.39108 |
|                   |                                   |                |                                                 | H (4i)                          | 0.27773 | 0.00000 | 0.39268 |
|                   |                                   |                |                                                 | H (4i)                          | 0.89640 | 0.00000 | 0.84750 |
|                   |                                   |                |                                                 | H (4i)                          | 0.44640 | 0.00000 | 0.18355 |
|                   |                                   |                |                                                 | H (4g)                          | 0.50000 | 0.74364 | 0.00000 |
| 300               | Li <sub>2</sub> ThH <sub>12</sub> | $P2_1/m$       | $a = 3.53200$<br>$b = 3.54680$<br>$c = 5.98380$ | Li (2e)                         | 0.01847 | 0.75000 | 0.11250 |
|                   |                                   |                |                                                 | Li (2e)                         | 0.99558 | 0.75000 | 0.45257 |
|                   |                                   |                |                                                 | Th (2e)                         | 0.49888 | 0.75000 | 0.75121 |
|                   |                                   |                |                                                 | H (4f)                          | 0.99768 | 0.95329 | 0.69057 |
|                   |                                   |                |                                                 | H (4f)                          | 0.00303 | 0.87567 | 0.88432 |
|                   |                                   |                |                                                 | H (4f)                          | 0.27349 | 0.48543 | 0.99365 |
|                   |                                   |                |                                                 | H (4f)                          | 0.70931 | 0.48883 | 0.50365 |
|                   |                                   |                |                                                 | H (2e)                          | 0.28923 | 0.75000 | 0.28268 |
|                   |                                   |                |                                                 | H (2e)                          | 0.72427 | 0.75000 | 0.26008 |
|                   |                                   |                |                                                 | H (2e)                          | 0.55511 | 0.25000 | 0.90935 |
|                   |                                   |                |                                                 | H (2e)                          | 0.40291 | 0.25000 | 0.58995 |
| 300               | Li <sub>2</sub> ThH <sub>13</sub> | $C2/c$         | $a = 7.96520$<br>$b = 6.05190$<br>$c = 3.56000$ | Li (8f)                         | 0.76931 | 0.91589 | 0.48553 |
|                   |                                   |                |                                                 | Th (4e)                         | 0.50000 | 0.75362 | 0.75000 |
|                   |                                   |                |                                                 | H (8f)                          | 0.42445 | 0.91230 | 0.19375 |
|                   |                                   |                |                                                 | H (8f)                          | 0.38924 | 0.75413 | 0.14395 |
|                   |                                   |                |                                                 | H (8f)                          | 0.24986 | 0.87176 | 0.41265 |
|                   |                                   |                |                                                 | H (8f)                          | 0.24758 | 0.19975 | 0.20649 |
|                   |                                   |                |                                                 | H (8f)                          | 0.62773 | 0.99737 | 0.61433 |
|                   |                                   |                |                                                 | H (4e)                          | 0.89668 | 0.00856 | 0.37397 |
|                   |                                   |                |                                                 | H (8f)                          | 0.89668 | 0.00856 | 0.37397 |
|                   |                                   |                |                                                 | H (4e)                          | 0.50000 | 0.58474 | 0.25000 |

TABLE S2. The superconducting parameters for  $\text{Li}_2\text{ThH}_{17}$  without/with SOC effect under 300 GPa.

|             | $\lambda$ | $\omega_{\log}$ (K) | $T_c^{\text{ADM}}$ (K) |
|-------------|-----------|---------------------|------------------------|
| Without SOC | 1.55      | 1135                | 154                    |
| With SOC    | 1.54      | 1137                | 153                    |

TABLE S3. The value of the H-derived electronic density of states at the Fermi level (states/eV f.u.) its proportion of the total density of states for  $\text{Li}_2\text{ThH}_{17}$  and  $\text{Li}_2\text{ThH}_{16}$  under different pressures.

| Phase                        | Pressure (GPa) | $\text{DOS}_H$ | Total DOS | Proportion |
|------------------------------|----------------|----------------|-----------|------------|
| $\text{Li}_2\text{ThH}_{17}$ | 250            | 0.45           | 1.00      | 45.0 %     |
|                              | 300            | 0.47           | 1.07      | 43.9 %     |
|                              | 350            | 0.43           | 0.99      | 43.4 %     |
| $\text{Li}_2\text{ThH}_{16}$ | 180            | 0.43           | 0.85      | 50.6 %     |
|                              | 300            | 0.42           | 0.87      | 48.3 %     |

TABLE S4. Calculated electron-phonon coupling related parameters for  $\text{Li}_2\text{ThH}_{17}$  under different pressures.

| Pressure (GPa) | $\lambda$ | $\omega_{\log}$ (K) | $N_{Ef}$ ( $\text{eV}^{-1}$ ) | $\langle\omega^2\rangle$ ( $\text{eV}^2$ ) | $\langle I^2 \rangle$ | $T_c^E$ (K) |
|----------------|-----------|---------------------|-------------------------------|--------------------------------------------|-----------------------|-------------|
| 250            | 1.45      | 1177                | 1.00                          | 0.0208                                     | 13.93                 | 159         |
| 300            | 1.55      | 1135                | 1.07                          | 0.0208                                     | 15.39                 | 162         |
| 350            | 1.87      | 975                 | 0.99                          | 0.0188                                     | 16.99                 | 187         |

TABLE S5. Calculated Bader charge (eV/f.u.) and electronic properties at the Fermi level (states/eV f.u.) for  $\text{Li}_2\text{ThH}_{17}$  and  $\text{LiLaH}_{17}$  at 300 GPa.

| Phase                        | atom | Bader charge | DOS  | Total DOS | Proportion |
|------------------------------|------|--------------|------|-----------|------------|
| $\text{Li}_2\text{ThH}_{17}$ | Li   | +1.63        | 0.12 | 1.07      | 11.2 %     |
|                              | Th   | +1.44        | 0.48 |           | 44.9 %     |
|                              | H    | -3.07        | 0.47 |           | 43.9 %     |
| $\text{Li}_2\text{LaH}_{17}$ | Li   | +1.63        | 0.01 | 0.91      | 1.1 %      |
|                              | La   | +1.03        | 0.34 |           | 37.4 %     |
|                              | H    | -2.66        | 0.56 |           | 61.5 %     |

TABLE S6.  $N(E_f)$  (states/Ry/f.u.), electron-phonon coupling constant  $\lambda$ , logarithmic average phonon frequency  $\omega_{\text{log}}$  (K), and superconducting transition temperature  $T_c$  (K) estimated using  $\mu^* = 0.13$  for Li-RE-H compounds at different pressures (GPa). Superhydrides marked with (M) indicate metastable phases at 300 GPa.

| Compound                                 | Pressure (GPa) | $N(E_f)$ | $\lambda$ | $\omega_{\text{log}}$ (K) | $T_c$ (K) |
|------------------------------------------|----------------|----------|-----------|---------------------------|-----------|
| $\text{Li}_2\text{YH}_{17}$              | 300            | 2.99     | 0.69      | 1758                      | 50        |
| $\text{Li}_2\text{LaH}_{17}$             | 300            | 4.87     | 0.86      | 1854                      | 99        |
| $\text{Li}_2\text{LaH}_{17}$ (this work) | 300            | 4.52     | 0.85      | 1856                      | 94        |
| $\text{Li}_2\text{ScH}_{17}$ (M)         | 300            | 3.94     | 1.11      | 941                       | 80        |
| $\text{Li}_2\text{ThH}_{17}$ (this work) | 300            | 7.43     | 1.55      | 1135                      | 162       |

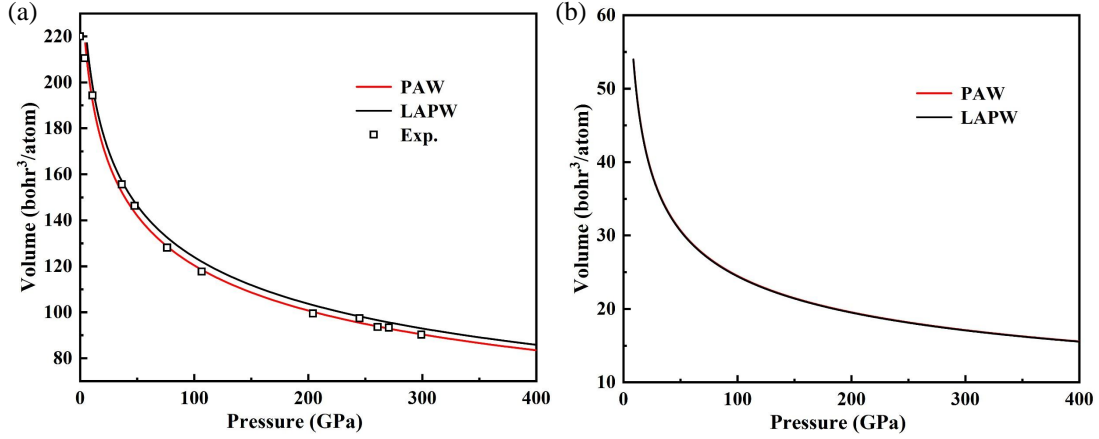

FIG. S1. Comparison of the fitted Birch-Murnaghan equation of states for (a)  $Fm\bar{3}m$  Th and (b) LiH using calculated results with the PAW pseudopotentials, full-potential LAPW methods and experimental data. The results further validate the reliability of the adopted PAW pseudopotentials under pressure.

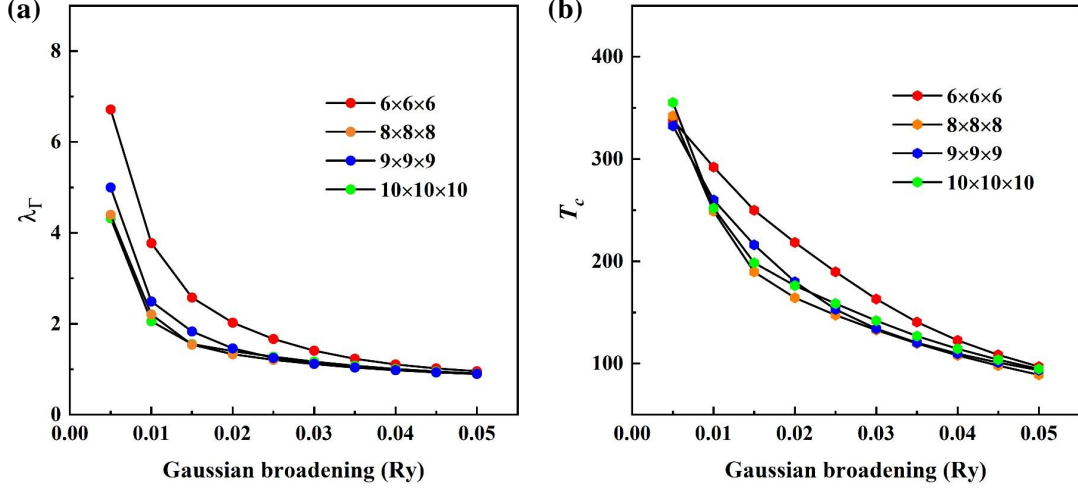

FIG. S2. (a) Electron-phonon constant  $\lambda(q)$  and (b)  $T_c$  at  $q = (0, 0, 0)$  as a function of the Gaussian broadening  $\sigma$  for  $Fd\bar{3}m$   $\text{Li}_2\text{ThH}_{17}$  at 300 GPa for different  $k$ -point grids. The  $9 \times 9 \times 9$  is considered to be converged to the required accuracy.

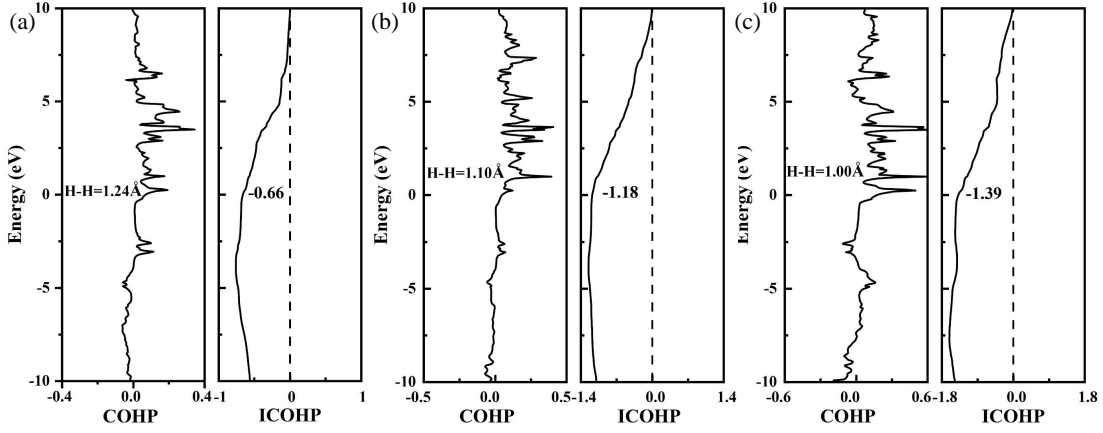

FIG. S3. The COHP and ICOHP of  $\text{Li}_2\text{ThH}_{17}$  at 300 GPa for different H-H bonds from  $\text{H}_{28}$  calthrate. The negative COHP indicates bonding and positive COHP indicates antibonding.

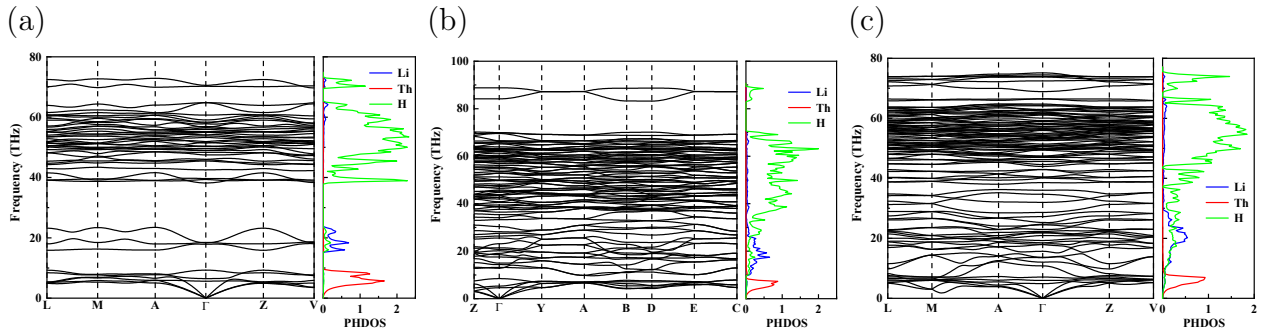

FIG. S4. Phonon dispersions, projected phonon density of states (PHDOS) of (a)  $C2/m$   $\text{Li}_2\text{Th}_2\text{H}_{12}$ , (b)  $P2_1/m$   $\text{Li}_2\text{ThH}_{12}$  and (c)  $C2/c$   $\text{Li}_2\text{ThH}_{13}$  at 300 GPa.

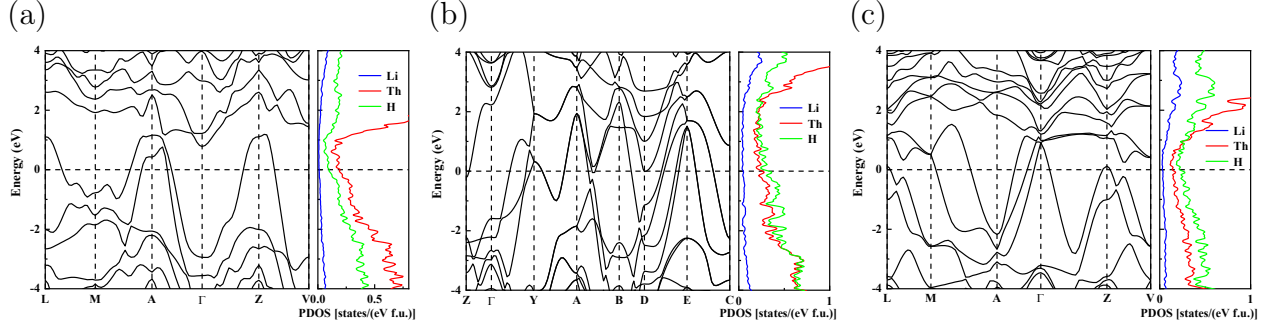

FIG. S5. Electronic band structure and atom-projected density of states near the Fermi level for (a)  $C2/m$   $\text{LiTh}_2\text{H}_{12}$ , (b)  $P2_1/m$   $\text{Li}_2\text{ThH}_{12}$  and (c)  $C2/c$   $\text{Li}_2\text{ThH}_{13}$  at 300 GPa.

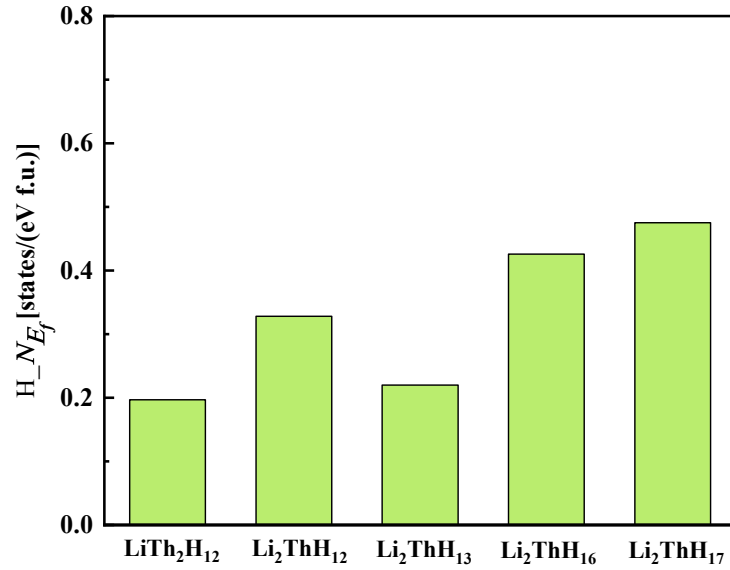

FIG. S6. The calculated values of  $\text{DOS}_H$  ( $\text{eV}^{-1}$  per formula unit) at the Fermi level  $N_{E_f}$  in Li-Th-H system at 300 GPa.

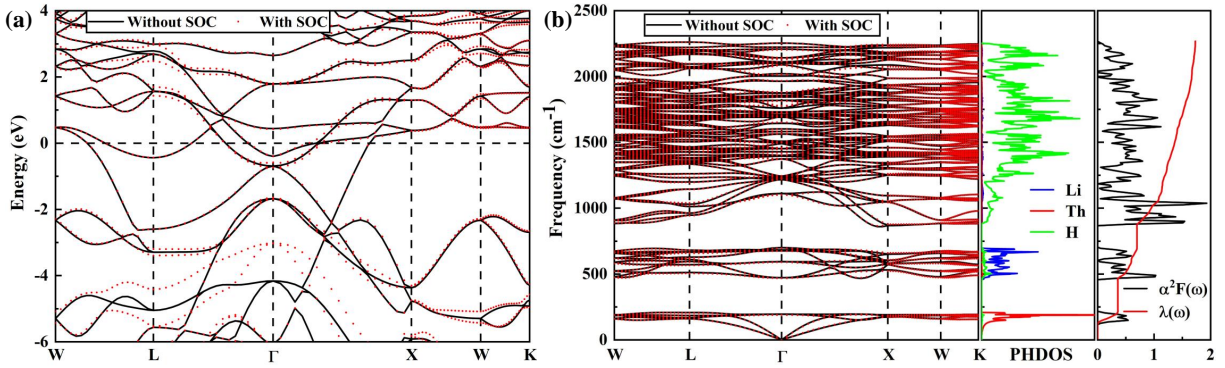

FIG. S7. Calculated (a) electronic structure and (b) superconducting properties with SOC of  $\text{Li}_2\text{ThH}_{17}$  at 300 GPa.

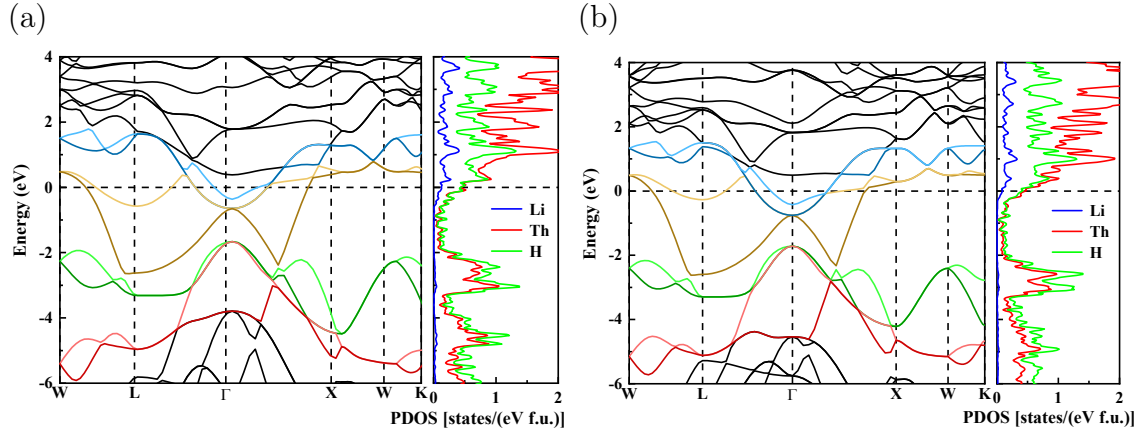

FIG. S8. Calculated electronic band structure and density of states (states/eV/cell) for  $\text{Li}_2\text{ThH}_{17}$  at (a) 350 GPa and (b) 250 GPa, respectively.

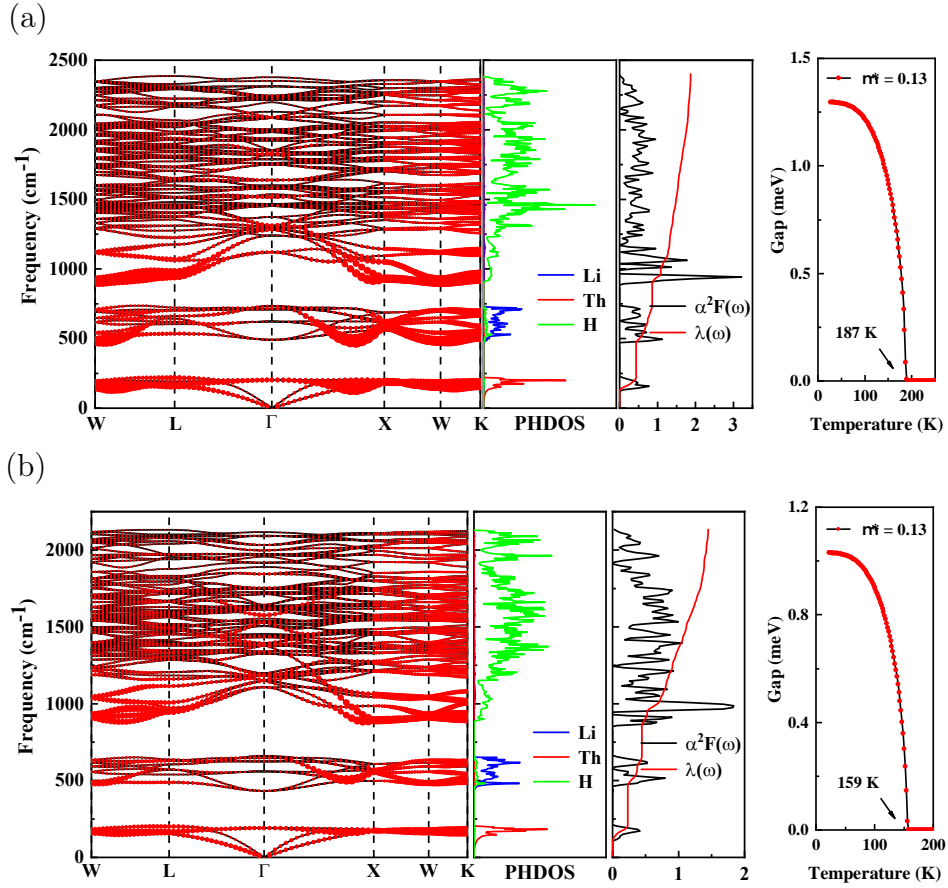

FIG. S9. Phonon dispersion, PHDOS, Eliashberg spectral function  $\alpha^2F(\omega)$ , EPC parameter  $\lambda(\omega)$  and Superconducting energy gap for  $\text{Li}_2\text{ThH}_{17}$  at (a) 350 GPa and (b) 250 GPa, respectively.

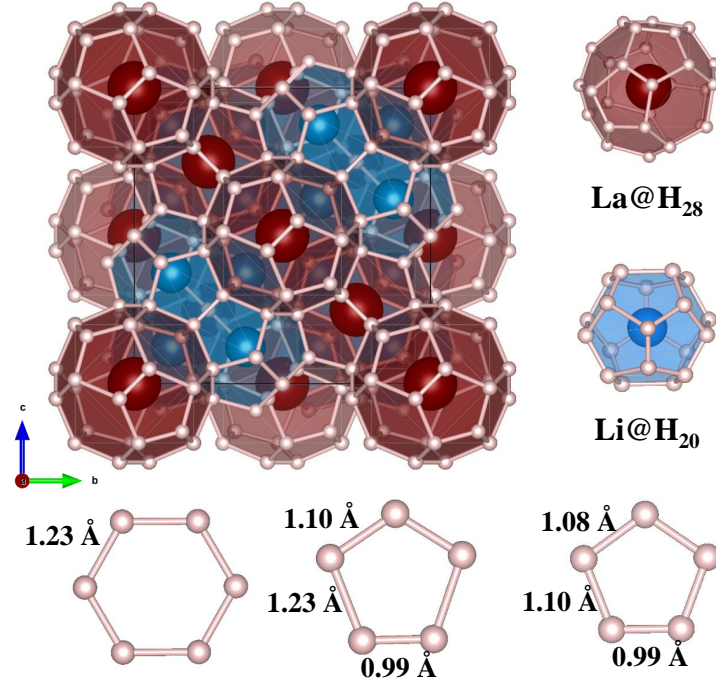

FIG. S10. The structure of  $Fd\bar{3}m$   $\text{Li}_2\text{LaH}_{17}$  at 300 GPa.

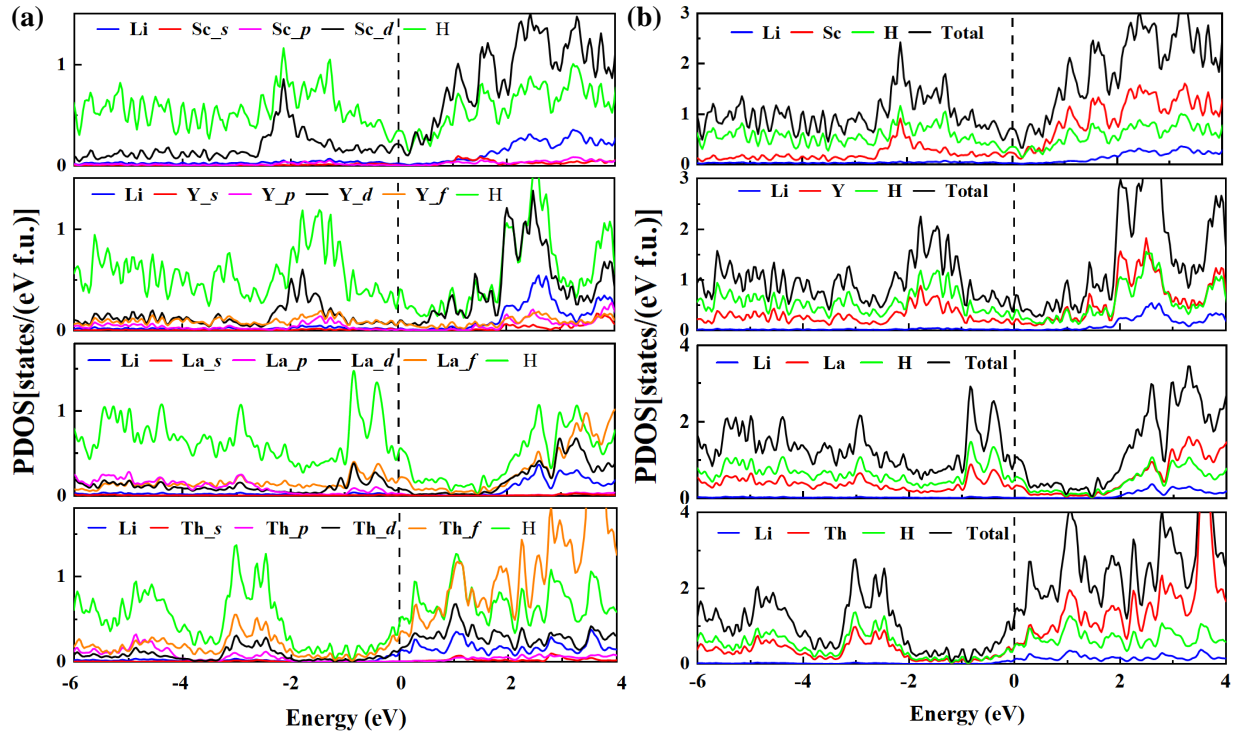

FIG. S11. Calculated orbit-projected and element-projected density of states near the Fermi level for  $\text{Li}_2\text{REH}_{17}$  and  $\text{Li}_2\text{REH}_{17}$  (RE = Sc, Y and La) at 300 GPa.

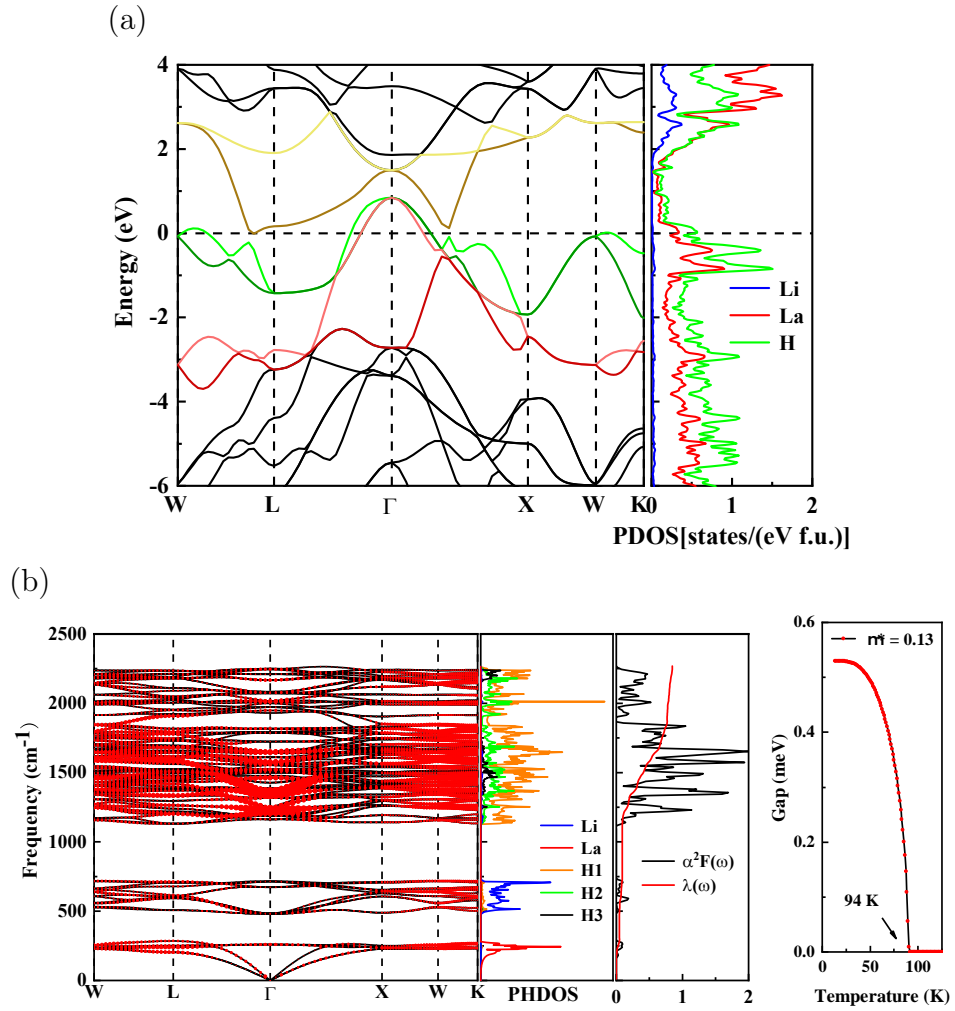

FIG. S12. (a) Calculated electronic band structure, PDOS (states/eV/cell) and (b) Phonon dispersion, PHDOS,  $\alpha^2F(\omega)$ ,  $\lambda(\omega)$  and Superconducting energy gap for  $\text{Li}_2\text{LaH}_{17}$  at 300 GPa.

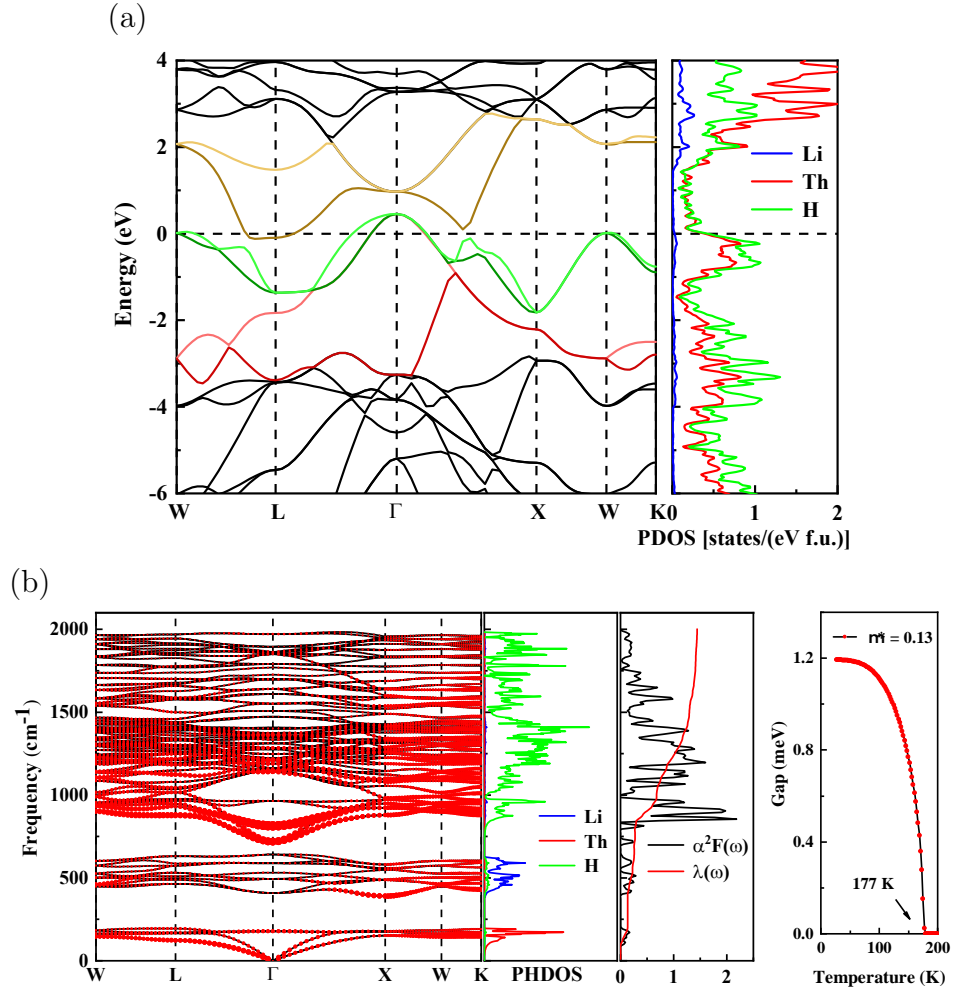

FIG. S13. (a) Calculated electronic band structure, PDOS (states/eV/cell) and (b) Phonon dispersion, PHDOS,  $\alpha^2F(\omega)$ ,  $\lambda(\omega)$  and Superconducting energy gap for  $\text{Li}_2\text{ThH}_{16}$  at 180 GPa.

\_\_\_\_\_
